# Supplementary material for: Chromatin analysis of occluded genes
Source: PubMed Central journal article supplement — Hum Mol Genet. 2009 Apr 20;18(14):2567–74. doi: 10.1093/hmg/ddp188 (PMC2701328; doi:10.1093/hmg/ddp188), 2009-04-20
Supplement: ddp188_1.pdf [file ddp188_1.pdf]

**Figure S1: Bisulfite sequencing analysis of occluded and transactivated hLF genes.**

Occluded genes include *Myod1* (A), *Cacng1* (B), *Rapsn* (C), and *Tnni2* (D). Transactivated genes include *Myog* (E), *Okm* (F), *Tnni1* (G), and *Tnnc1* (H). Comparison is made between hLF and hSMM. This figure follows the same convention as Figure 4. hLF: human lung fibroblasts; hSMM: human skeletal muscle myoblasts.

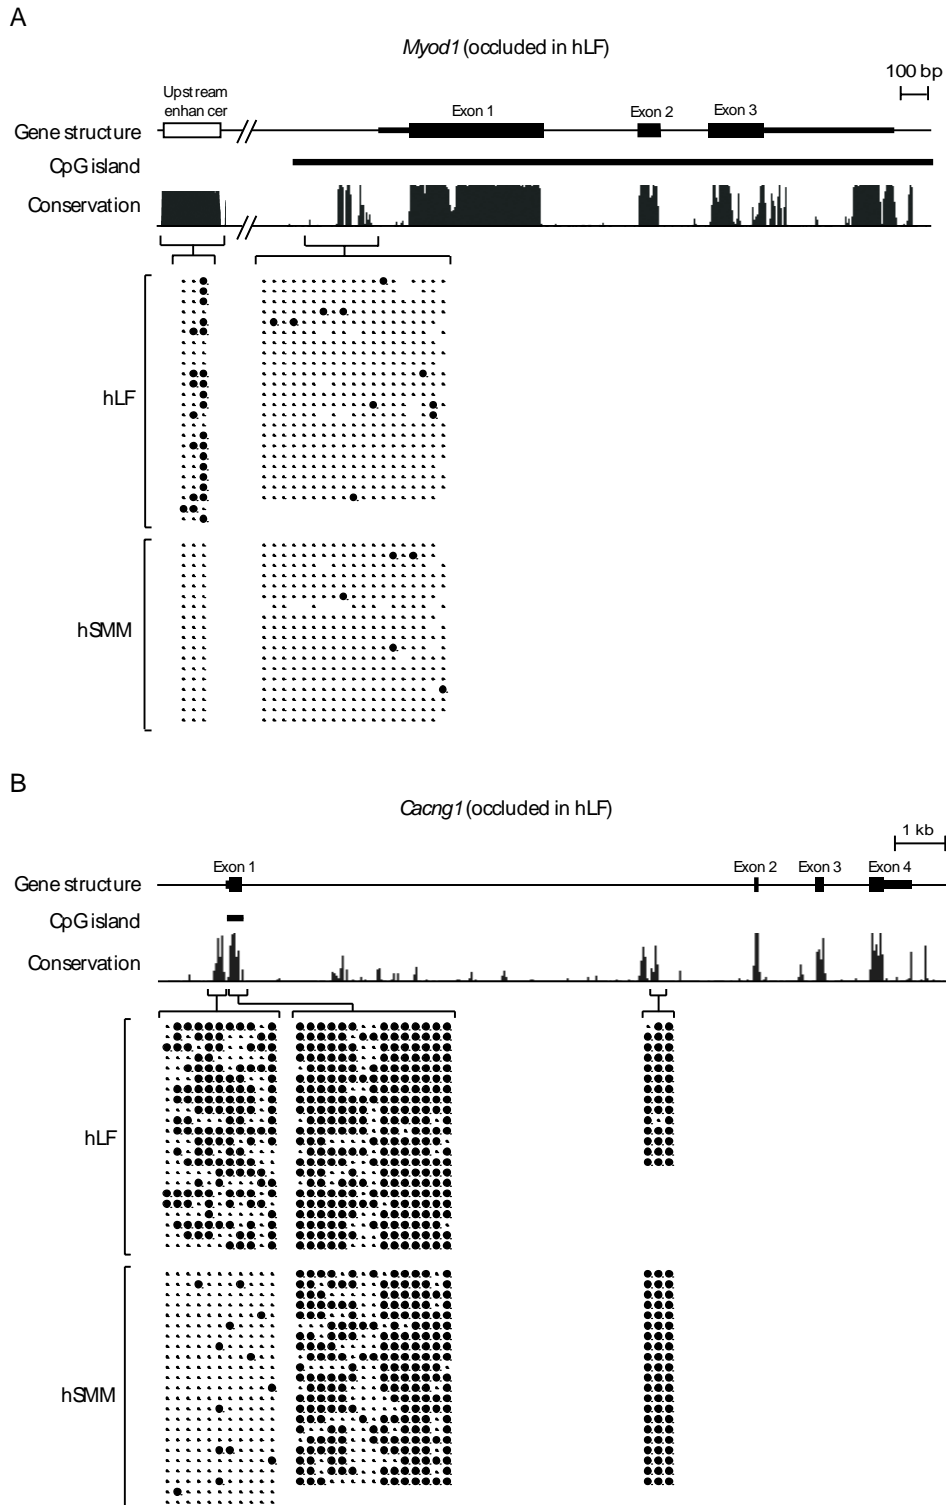

Figure S1: (continued)

C

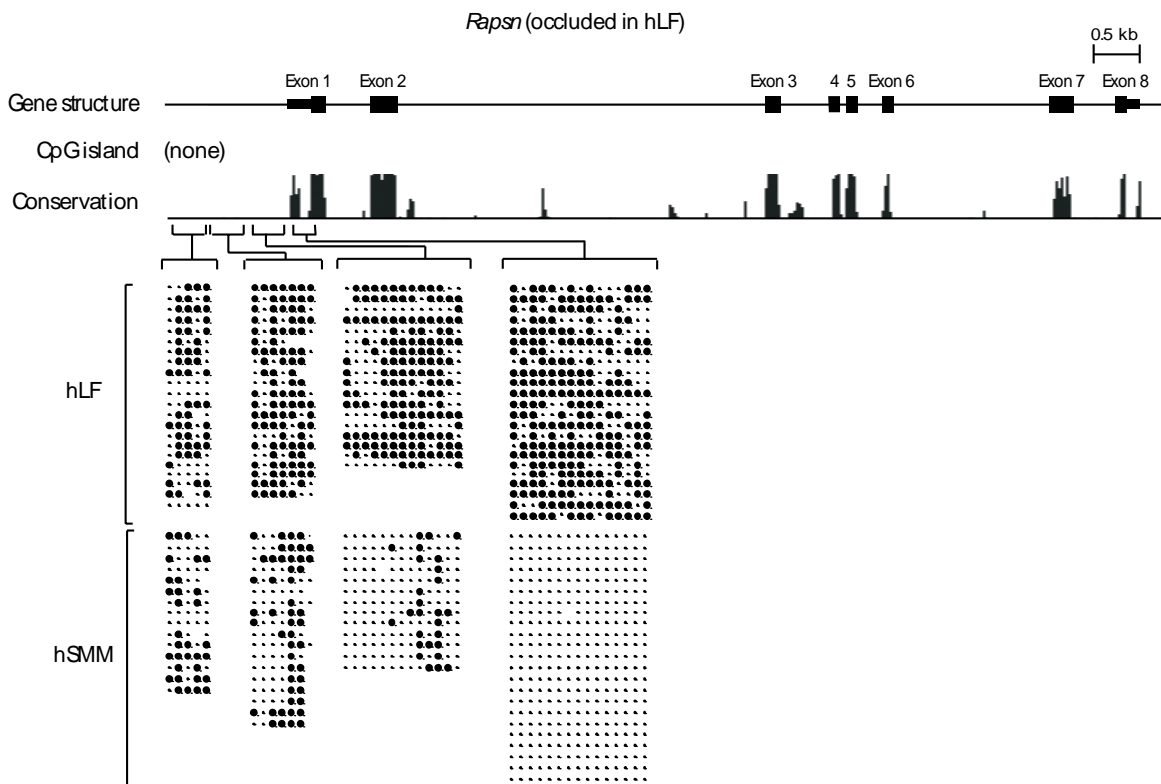

D

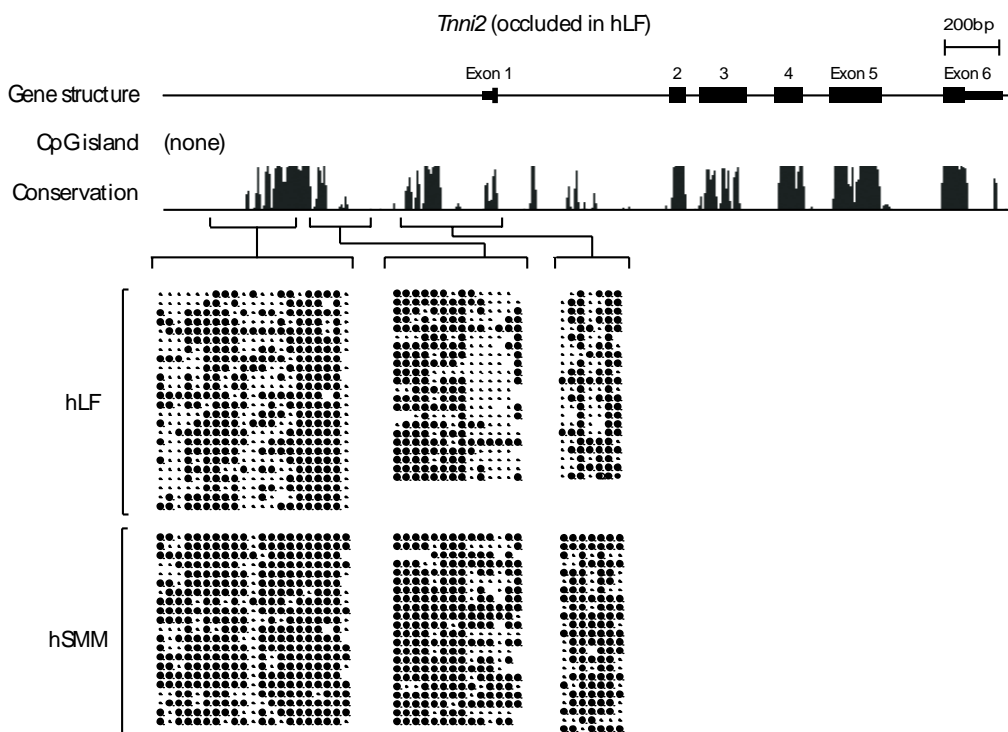

Figure S1: (continued)

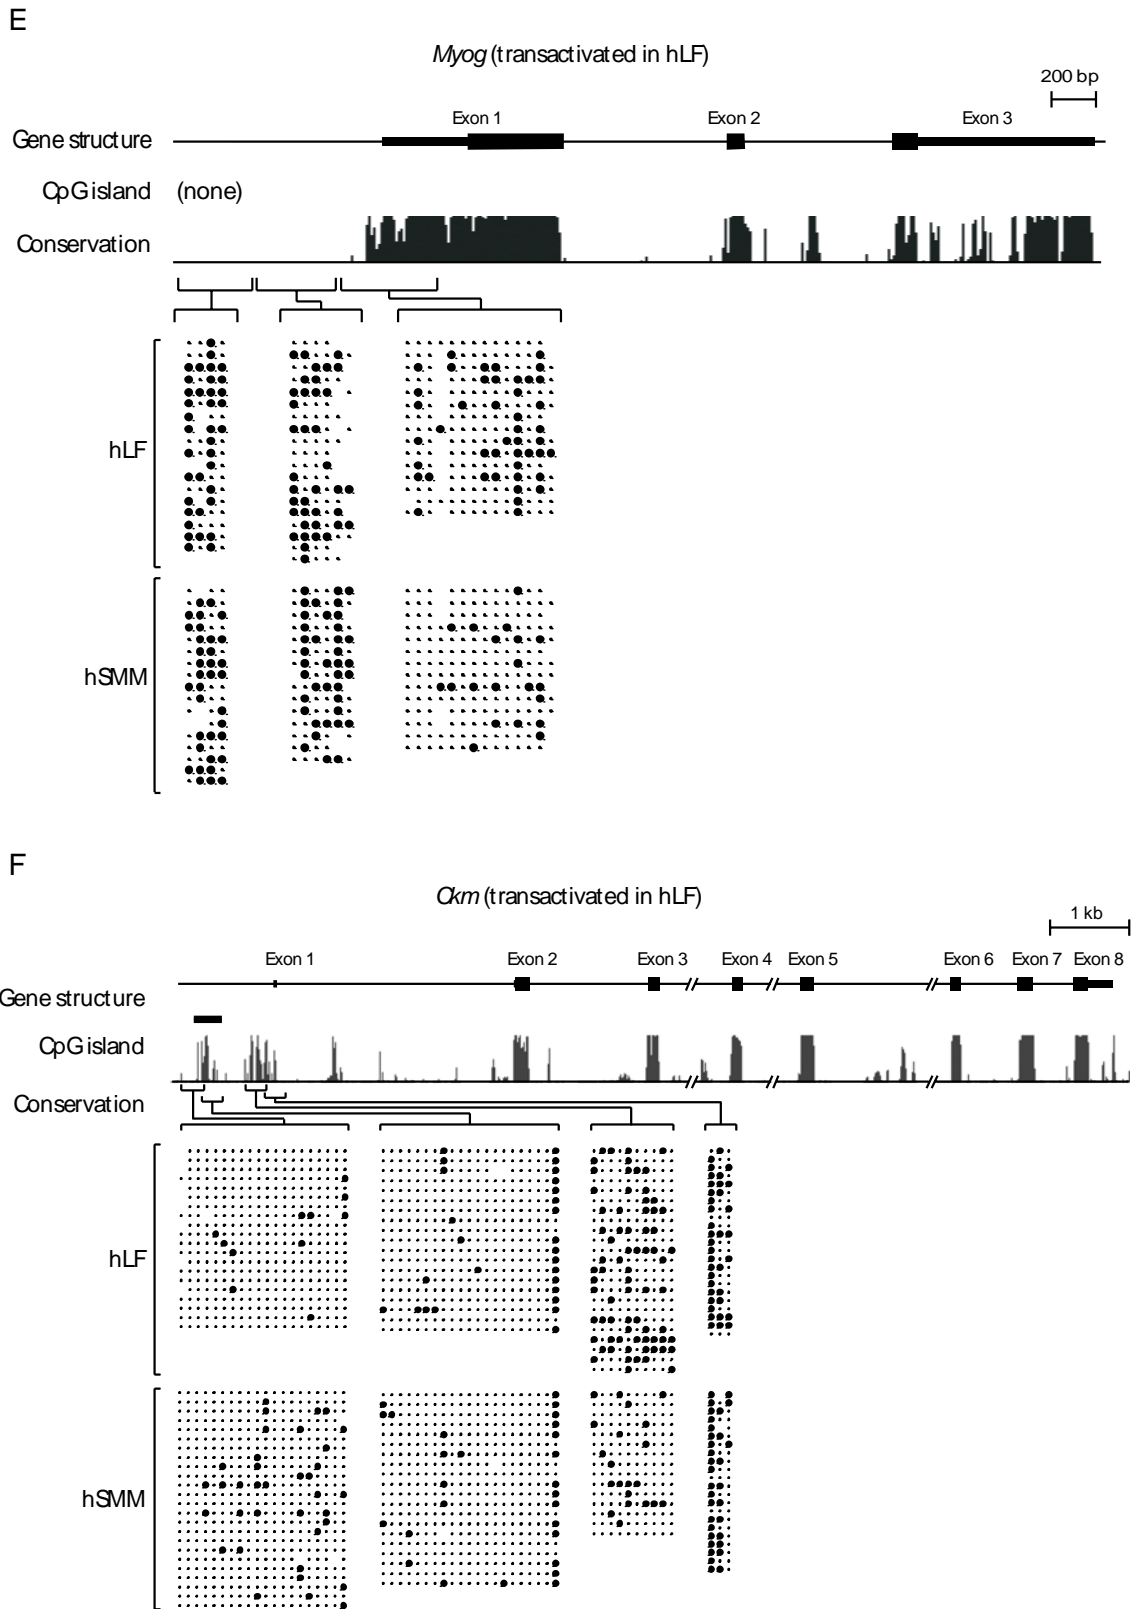

Figure S1: (continued)

G

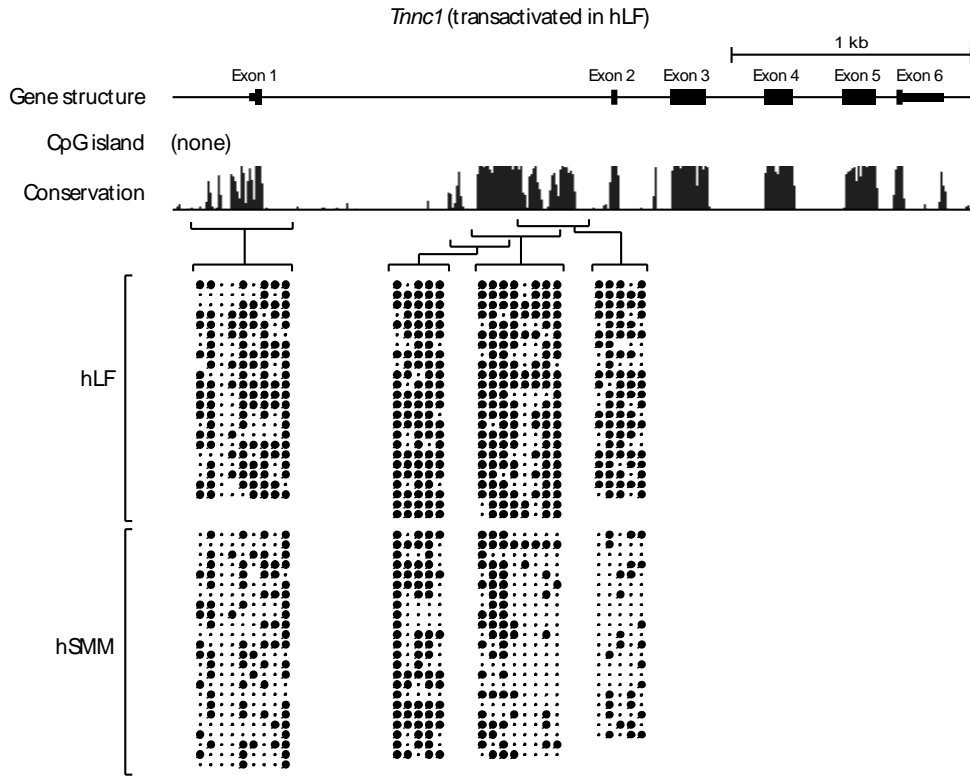

H

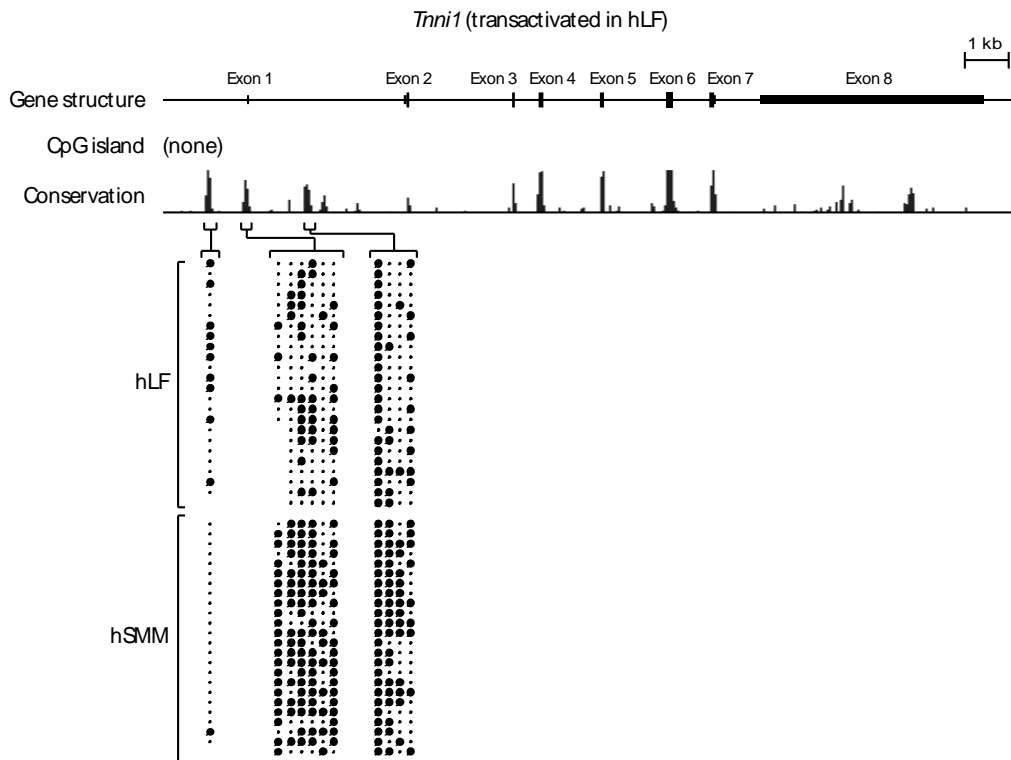

**Figure S2: Bisulfite sequencing analysis of transcription start site (TSS) of 18 occluded and 5 transactivated hLF genes.**

Comparison is made between hLF and hSMM. The TSS of *Ncam1* is covered in 2 amplicons. *Cxcr4* and *Myf4* each have two distinct TSS (indicated as a & b), which are analyzed separately. Genes indicated by “\*” are not expressed in hSMM, and it is therefore not known if they are occluded or competent in hSMM. All the other genes are expressed (and therefore competent) in hSMM. hLF: human lung fibroblasts; hSMM: human skeletal muscle myoblasts.

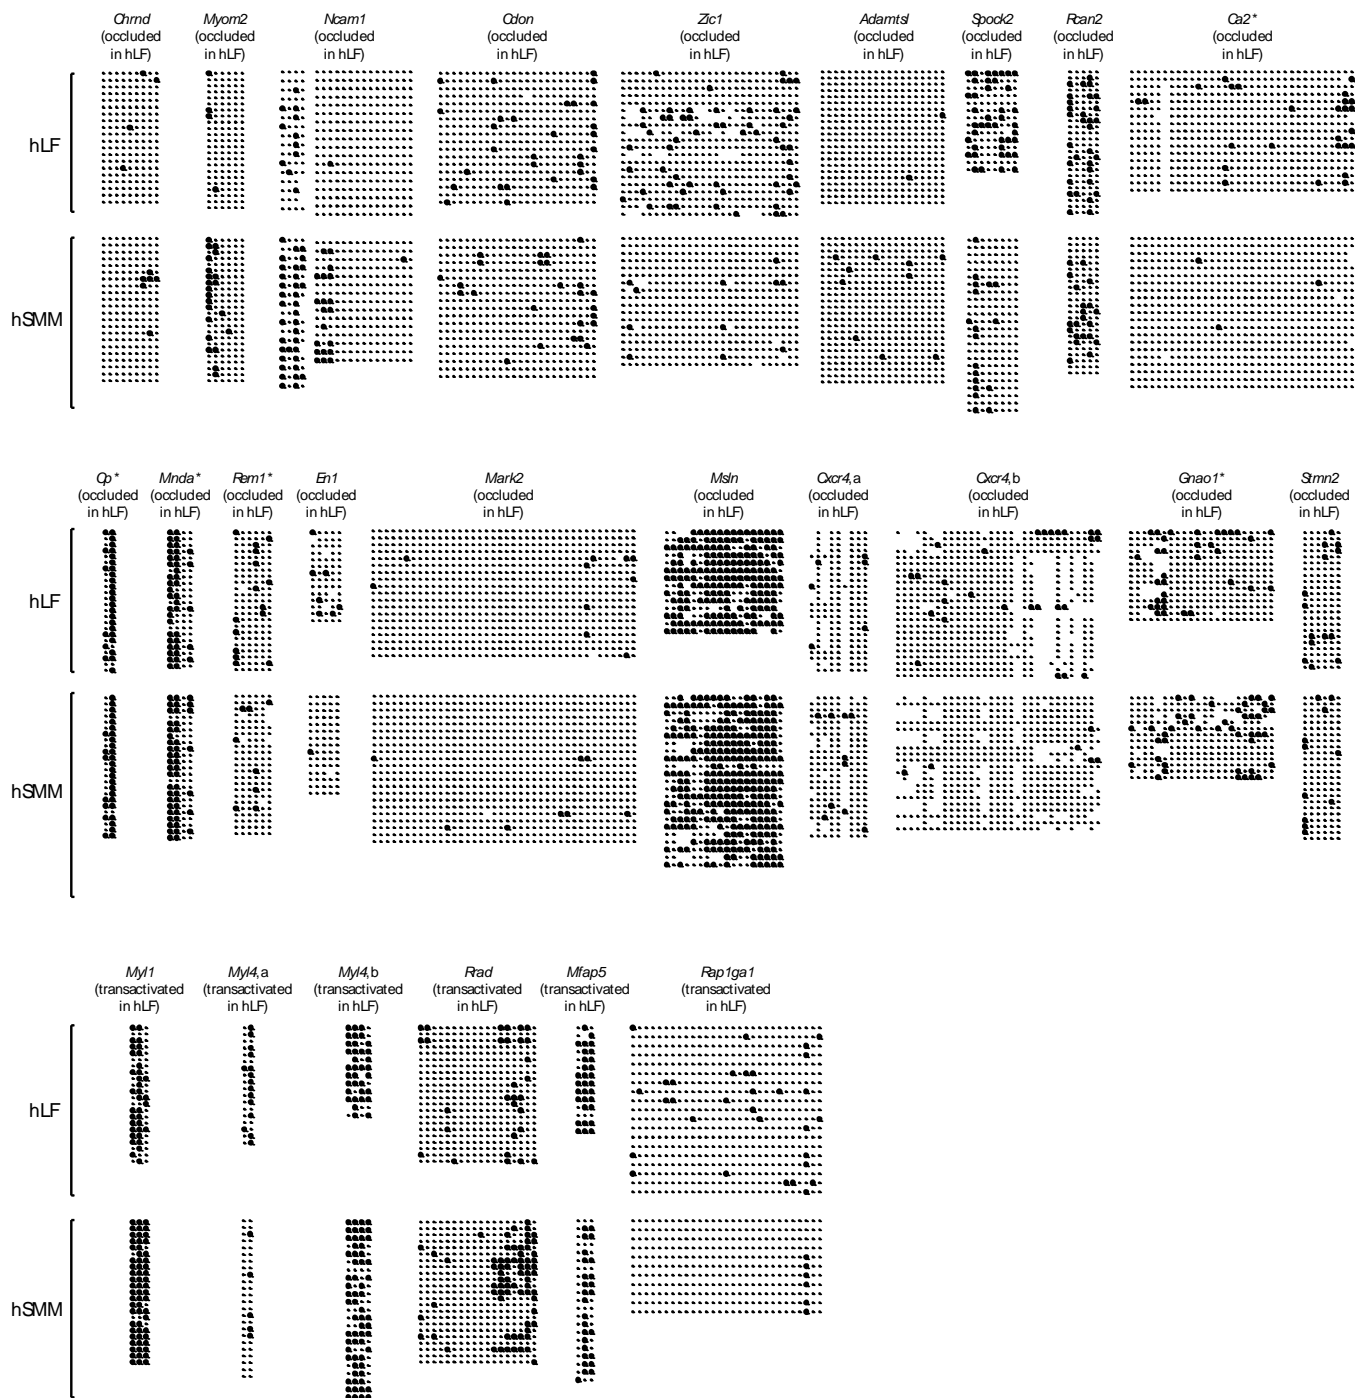

**Table S1. Occluded and transactivated hLF genes targeted by chromatin analysis.**

| Gene Symbol            | Gene Name                                                          | Alternate Names             | Gene Function                                                                                                                                                  |
|------------------------|--------------------------------------------------------------------|-----------------------------|----------------------------------------------------------------------------------------------------------------------------------------------------------------|
| Myod1<br>(occluded)    | Myogenic differentiation antigen 1                                 | Myod, Myf3                  | Basic helix-loop-helix transcription factor playing a key role in specifying the myogenic lineage, believed to engage in positive autoregulation.              |
| Myf5<br>(occluded)     | Myogenic factor 5                                                  |                             | Basic helix-loop-helix transcription factor playing a key role in specifying the myogenic lineage, believed to be positively regulated by Myod1.               |
| Chrnd<br>(occluded)    | Cholinergic receptor, nicotinic, delta subunit                     | Achrd                       | Subunit of the nicotinic acetylcholine receptor present in synapses of the neuromuscular junction.                                                             |
| Cacng1<br>(occluded)   | Calcium channel, voltage-dependent, gamma-1 subunit                |                             | Subunit of calcium channel controlling calcium ion influx in skeletal muscle.                                                                                  |
| Rapsn<br>(occluded)    | Receptor associated protein of the synapse, 43 kD                  | Rapsyn                      | Peripheral membrane protein involved in the localization and clustering of neurotransmitter receptors on dendritic processes.                                  |
| Myom2<br>(occluded)    | Myomesin 2                                                         |                             | Structural component of cytoskeleton found specifically in skeletal muscle.                                                                                    |
| Tnni2<br>(occluded)    | Troponin 1                                                         |                             | Actin groove protein involved in fast twitch muscle contraction in skeletal muscle.                                                                            |
| Ncam1<br>(occluded)    | Neural cell adhesion molecule 1                                    | CD56; Msk39                 | Cell membrane glycoprotein possibly involved in cell adhesion and migration in developing brain and muscle.                                                    |
| Cdon<br>(occluded)     | Cell adhesion molecule-related/down regulated by oncogenes         | Cdo                         | Positive regulator of myogenesis and development of midline structures.                                                                                        |
| Zic1<br>(occluded)     | Zinc finger protein of cerebellum 1                                | Zic                         | Zinc finger protein family member specifically restricted to folial development of the cerebellum.                                                             |
| Adamtsl2<br>(occluded) | Adamts-like 2                                                      |                             | Disintegrin and metalloproteinase family member containing a thrombospondin type 1 motif, believed to mediate endopeptidase function and cellular de-adhesion. |
| Spock2<br>(occluded)   | Sparc/Osteonectin, Cwcv, and Kazal-like domains proteoglycan 2     | Testican 2                  | Calcium-binding protein involved in neurite extension, but expressed in multiple tissues.                                                                      |
| Rcan2<br>(occluded)    | Regulator of calcineurin                                           | Dscr111, Csp2, Mcip2, Zak14 | Idiopathic function with expression in liver, heart, brain, and lungs dependent on regulation by triiodothyroxine.                                             |
| Ca2<br>(occluded)      | Carbonic Anhydrase 2                                               |                             | Metalloprotein responsible for catalyzating carbon dioxide to bicarbonate.                                                                                     |
| Cp<br>(occluded)       | Ceruloplasmin                                                      | Ferroxidase                 | Plasma metalloprotein involved in the peroxidation of iron.                                                                                                    |
| Mnda<br>(occluded)     | Myeloid cell nuclear differentiation antigen                       |                             | Transcription factor believed to be involved in blood cell response to interferon stimulation.                                                                 |
| Rem1<br>(occluded)     | Ras (Rad and Gem)-like GTP-binding 1                               |                             | Ras-related small GTP-binding protein involved in regulating cell shape and calcium ion channel function.                                                      |
| Ly75<br>(occluded)     | Lymphocyte antigen 75                                              | CD205                       | Involved in the cascade response to antigenic stimuli leading to CD4-positive T cell response.                                                                 |
| En1<br>(occluded)      | Engrailed 1                                                        |                             | Homeobox-containing transcription factor involved in hindbrain and peripheral nervous system formation during embryogenesis.                                   |
| Mark2<br>(occluded)    | MAP/microtubule affinity-regulating kinase 2                       | Emk1                        | Kinase involved in regulating microtubule stability by phosphorylating the EMK class of microtubule associated proteins.                                       |
| Msln<br>(occluded)     | Mesothelin                                                         | Cak1; Mpf; Smr              | Glycosylphosphatidylinositol binding protein for cell-cell adhesion.                                                                                           |
| Cxcr4<br>(occluded)    | Chemokine CXC motif receptor 4                                     | Npy3r; Fusin; Lestr; Lap3   | Pleiotrophic receptor for SDF1 involved in neural and hematopoietic development.                                                                               |
| Gnao1<br>(occluded)    | Guanine nucleotide-binding protein, alpha-activating polypeptide O | Gnao                        | Pleiotrophic function involved in the binding of GRIN1 and upregulation of CDC42-mediated alteration in neuronal cell morphology.                              |
| Stmn2<br>(occluded)    | Stathmin-like 2                                                    | Scgn10; Scg10               | Involved in regulating neurite growth by binding microtubule dimmers.                                                                                          |

|                             |                                                 |           |                                                                                                                                                      |
|-----------------------------|-------------------------------------------------|-----------|------------------------------------------------------------------------------------------------------------------------------------------------------|
| Myog<br>(transactivated)    | Myogenin                                        | Myf4      | Basic helix-loop-helix transcription factor playing a critical role in specifying the myogenic lineage, believed to be downstream of Myod1 and Myf5. |
| Ckm<br>(transactivated)     | Creatine kinase, muscle type                    | Ckmm      | Muscle-specific enzyme involved in energy delivery.                                                                                                  |
| Acta1<br>(transactivated)   | Actin, alpha 1, skeletal muscle 1               | Asma      | Skeletal muscle-specific actin isoform.                                                                                                              |
| My11<br>(transactivated)    | Myosin; light polypeptide 1                     |           | One of several myosin alkali light chain constituent of the sarcomere.                                                                               |
| My14<br>(transactivated)    | Myosin, light polypeptide 4                     | MLC1a     | One of several myosin alkali light chain constituent of the sarcomere.                                                                               |
| Tnnc1<br>(transactivated)   | Troponin C, slow                                | Tnc       | Myofibrillar protein involved in calcium-mediated contraction of striated muscle.                                                                    |
| Tnni1<br>(transactivated)   | Troponin 1, slow-twitch skeletal muscle isoform |           | Myofibrillar protein involved in calcium-mediated contraction of striated muscle.                                                                    |
| Rrad<br>(transactivated)    | Ras-related associated with diabetes            | Rad; Rad1 | Rho kinase pathway second messenger involved in multiple cellular processes including cytoskeletal (dis)assembly.                                    |
| Mfap5<br>(transactivated)   | Microfibrillar associated protein 5             | MAGP2     | Involved in stimulating the assembly of elastic fibers in maturing muscle cell types.                                                                |
| Rap1ga1<br>(transactivated) | Rap1, GTPase activating protein                 | Rap1gap   | Guanine nucleotide binding protein involved in integrin-mediated cell adhesion.                                                                      |





**Table S3: Genes targeted by ChIP-PCR analysis.**

|                 | Genes                | PCR primer sequences (forward; reverse)            |                                                   |
|-----------------|----------------------|----------------------------------------------------|---------------------------------------------------|
| Occluded genes  | Myod1-En             | CTTCCTATAAACTTCTGAGAGGGTAAC; GACTCCAGGAAGGAAGACAAG |                                                   |
|                 | Myod1                | CCCCGAGTGTTCCTATTGG; CCCGGCTGTAGATAGCAAAG          |                                                   |
|                 | Myf5-En              | TACAACAGCTGAGCGAAGAGA; CTTCATGACGCATAGTAAAGCATT    |                                                   |
|                 | Myf5                 | GCCTCCCTCCCGAAAGAATA; GCCGTCGTAGAAGTACTCAGA        |                                                   |
|                 | Myf5-Int             | ATGGAAGAATAACCCACACGG; GAAGAAGAGGAGAGCAGCAG        |                                                   |
|                 | ChrmD                | GATCTTTGCCTCATGTCCTTGG; GGAGGGTGTCTTCCCTTACC       |                                                   |
|                 | Cacng1               | AGCTCGGCTTGTCACT; CTTGGTACAATCCGCCAGA              |                                                   |
|                 | Rapsn                | ACCTCTGACACTGACCCTG; TGGCCTGGATGAGTGA              |                                                   |
|                 | Myom2                | TGCAGTTTGGGACTCAGAAAG; TCACCAAGCCACCCACA           |                                                   |
|                 | Tnni2                | AGGTATTAGACACTCCCTGACC; GGGTGAAGAAGTAAAGAGAGAAAG   |                                                   |
|                 | Tnni2-Up             | CGTCACCGAGCCCTAAATAGA; GCTGGGCCTCACCTAGAAT         |                                                   |
|                 | Ncam1                | CCCATCCCTCTCCAAAGTTC; TTTACACCGCAGTCTCCC           |                                                   |
|                 | Cdon                 | CCTCTACCTAAGTTCTCTGAGCC; ACCACGCCTCTCCTAGC         |                                                   |
|                 | Cdon-Int             | GGCACGTAACCTCGGAGG; CTTGCAGAGTAGGCAGGTC            |                                                   |
|                 | Zic1                 | TCAAGCGCTTTACAATACCTGG; AGCGCGAGACTGATAGCA         |                                                   |
|                 | Adamts12             | TCTGGACACCCGACATGT; TATAGCTGTCAAGCGACACGG          |                                                   |
|                 | Spock2               | TCCTGCGAGTTATGGCTCTA; CAAGGCAGATGAAATGGTCAGA       |                                                   |
|                 | Rcan2-TSS1           | CCGTGGGTCAGTGGGAT; CTGAGGGCAGGGTGAGAG              |                                                   |
|                 | Rcan2-TSS2           | TTCTGTTAATTGCTCTGTGCCA; ACTCCTTTCCATGAACTGCTTT     |                                                   |
|                 | Ca2                  | CAAACACAACGGTGAGTGC; ATTCTCCACAGTGGCCT             |                                                   |
|                 | Cp                   | GACACAATTTAGTGTTGCACAAGAG; ATATTGTGACAGGAACAAGGGAG |                                                   |
|                 | Mnda                 | AACAGGAAAGGAGGGAGAAAC; CAGATGTCAGAGAAAGTGGTCA      |                                                   |
|                 | Rem1                 | CCATCCTTCTTTCTCGTCTG; TGGATGCTCCAGGCTGTA           |                                                   |
|                 | Ly75                 | CAGCCTGTCTCATCTGA; ATCCGCACGTACTCTTCC              |                                                   |
|                 | En1-Up               | TGGCAAGACGCTTAATCAAAGT; AGAGTCCGCCTAATCCA          |                                                   |
|                 | En1                  | CACGCCTAAGAACTCAGCTTT; CGTAAACGTGCGACGCTA          |                                                   |
|                 | Mark2-TSS1           | GGGTCGCTTCGTGGATTTC; ACCTGCTGCTCCCAACA             |                                                   |
|                 | Mark2-TSS2           | CACCTGCGGTCAGCACATC; CGGGTTTAGATCAACTCCTTCTC       |                                                   |
|                 | Mark2-TSS3           | CTGCTGCCATATCATTCTCACA; AGGAGCCGGTAGTTTCCAA        |                                                   |
|                 | Msln-Up              | AGGGCAGCTTTCCTTC; TGATGTGCAGGGTGATTGG              |                                                   |
|                 | Msln                 | CCCACCTCCCAATTGAGGAAAC; TCAGATCGCGGGCCAAAT         |                                                   |
|                 | Cxcr4-TSS1           | CACCTTGTCTACCTGCTGCC; TACCGACCACCCGCAA             |                                                   |
|                 | Cxcr4-TSS2           | CCCAAGTTTCATTTCCTCACTCT; GCCAATTCAAAGACGCTCG       |                                                   |
|                 | Gnao1                | GCTCCAGCCTCGACTATTATTT; CGATATCCTCTCCTGGGCT        |                                                   |
|                 | Stmn2                | TAGGCACAGCCAGTCT; GGAGCCCATGAATAATTACTACTCAG       |                                                   |
|                 | Transactivated genes | Myog                                               | CATCTGCTCCTTTCAATTACTCCTA; GTGCCATGAATGCCCA       |
|                 |                      | Ckm                                                | AGGCTGTGCTATTGGCTG; GGTGGCTTCTACGTGCTT            |
|                 |                      | Acta1                                              | ACAACCTGCTACTCTCGGCT; CCGCTCCTTCTTTGGTCAAC        |
|                 |                      | Myl1-TSS1                                          | TGGACAGTTCTCTAGTCAAGGG; GTCTCTTAGGCAAGGTGGGAA     |
|                 |                      | Myl1-TSS2                                          | ATCCCTGGCTGAGGCTT; CTTAAAGGAAGATGCTCCAAGAGA       |
|                 |                      | Myl4-TSS1                                          | GTTGAATGAATGACTGAGGTTGTG; AGCCCACTGCACATTCC       |
|                 |                      | Myl4-TSS2                                          | CCTGTCCTAGAGGTGAAGAGA; AGGAGTGATCTAAGAAGAAACCGA   |
|                 |                      | Tnnc1                                              | GGCTCACAGGACAGCTTG; GGGACAGGAGGGAAAGAAAC          |
|                 |                      | Tnnc1-Int                                          | GCTGAGGAAACCAACCCATT; CCACCCAGCTTGAGTTTCAT        |
|                 |                      | Tnni1-Up                                           | TCTGCCCTAATCTTCATCTCCA; GCTCCCTAACCTCCTGCTT       |
|                 |                      | Tnni1                                              | ATAGAACAGACCCACTGCCC; GCTGCTCATTCTTCCCTTCT        |
|                 |                      | Rrad                                               | ATTAGGAGGCCACGCACT; CCTCTATTCAGACAGCTACC          |
|                 |                      | Mfap5                                              | ATGAGATGAGGGAGAGCAAGAA; GTAAGAAAGAACCCAAAGGAACAAG |
| Rap1gap         |                      | GGGACGTCACATGACCG; CATGAGCTGTTGCCTGGA              |                                                   |
| Expressed genes |                      | Zeb1                                               | CCCTCAATTCAAATTCAGCAGTG; CATCCGCCATGATCCTCTC      |
|                 |                      | Bmp4-TSS1                                          | CCTCCCTCGCTTTCTTTCTT; CTTTCTAGTACTCCGCACG         |
|                 |                      | Bmp4-TSS2                                          | GCCTCGGCTTCCCTTATTT; CCTGCTGAACGCTGAGT            |
|                 |                      | Commd4                                             | GATTCTGGGAGACGAGGAG; TCATTCCGCTCCAGCA             |
|                 |                      | Clk2                                               | CACGTAGTTGGCAGGCAT; CACTACAGTCAGGCTTGCAAG         |
|                 |                      | Pnpla2                                             | CCTGAGAAAGCCTCTCGTTTG; CCGGACCTTGGCTTCTTAC        |
|                 | Sgpl1                | ATCACTGGAGGGTCTGGG; TCCACCTCTGCGTCTC               |                                                   |
|                 | Rsu1                 | CGAACACGCCTGTCTC; CCAACTTCGGCCCAATCA               |                                                   |
|                 | Bcl6-TSS1            | GGCCCAAGACGATGGTATG; CCCAGTGGTTCAAACCTCTC          |                                                   |
|                 | Bcl6-TSS2            | ACCACAGGAAGCCAGATT; TGCCCACTCAACCCA                |                                                   |
|                 | Diaph3-TSS1          | CGCAGCCAACACATCTGA; AAATCCAGGCCGATGACTTC           |                                                   |
|                 | Diaph3-TSS2          | AGTGCATTAATGAGGGCTGTT; CCTACACGAGGATTTAGAGCATT     |                                                   |
|                 | Ptov1                | CCCTGAAGTTGTGGCTCG; GCTGAGCCGTACCAAGC              |                                                   |
|                 | Kiaa0319l            | ACCGACCCGAAACACA; TTGCCGCTCATTTGCTT                |                                                   |
|                 | Ube2i                | TCCTGCGACGCTTCTAGA; CTGGACACCTACGCCCTTA            |                                                   |
|                 | Rhod                 | TCTTCAGGGACCTAGACGG; AGGACCACCTTGACGGA             |                                                   |
|                 | Itgb1-TSS1           | TCCTCTGCGCTCTGAT; AGAGGAGGAAACTGAGGCAC             |                                                   |
|                 | Itgb1-TSS2           | GGTCAAAGCGCAATACAAGATAC; TGGTTTGAGAGCCATCATGTT     |                                                   |
|                 | Mdm2                 | ATCATCCGGAGGTGGT; AGCAGGATCTCGGTCAGA               |                                                   |
|                 | Rpl30                | GACAGAGAACAGGACAGGAATTT; GTACCAATAGCAACCCGCA       |                                                   |
|                 | Gapdh                | CTCCCATCGGGCAATC; GCTGCGGGCTCAATTTATAGA            |                                                   |

Note: Each entry lists a PCR amplicon of a gene. All amplicons target TSSs of genes unless indicated otherwise as follows. En: upstream enhancer; Int: intronic enhancer; Up: immediate upstream of TSS; TSS#: one of multiple alternative TSSs.
